# Supplementary material for: Factors Associated with Mental Health Results among Workers with Income Losses Exposed to COVID-19 in China
Source: MDPI journal article supplement (doi:10.3390/ijerph17155627), 2020-08-04
Supplement: s1 [file s1]

**Table S1.** Prevalence of anxiety and associated factors.

| Variable                         | Prevalence      | aOR (95% CI)         | p-Value  |         |
|----------------------------------|-----------------|----------------------|----------|---------|
|                                  |                 |                      | Category | Overall |
| GAD-7, anxiety symptoms          |                 |                      |          |         |
| Overall                          | 197/398 (49.5%) |                      |          |         |
| Age (years)                      |                 |                      |          |         |
| 18–25                            | 33/78 (42.3%)   | 0.357 (0.144, 0.888) | 0.027    | <0.001  |
| 26–30                            | 40/127 (31.5%)  | 0.284 (0.126, 0.639) | 0.002    |         |
| 31–40                            | 99/145 (68.3%)  | 1.429 (0.687, 2.975) | 0.340    |         |
| >40                              | 25/48 (52.1%)   | 1 (Reference)        | NA       |         |
| Sex                              |                 |                      |          |         |
| Male                             | 97/201 (48.3%)  | 0.891 (0.576, 1.380) | 0.606    | 0.606   |
| Female                           | 100/197 (50.8%) | 1 (Reference)        | NA       |         |
| Education                        |                 |                      |          |         |
| <Undergraduate                   | 68/110 (61.8%)  | 1.128 (0.473, 1.662) | 0.708    | 0.111   |
| College                          | 74/180 (41.1%)  | 0.576 (0.279, 0.992) | 0.006    |         |
| >Master                          | 55/108 (50.9%)  | 1 (Reference)        | NA       |         |
| Marital Status                   |                 |                      |          |         |
| Married                          | 104/197 (52.8%) | 1.520 (0.902, 2.559) | 0.116    | 0.116   |
| Not married                      | 93/201 (46.2%)  | 1 (Reference)        | NA       |         |
| Working Location                 |                 |                      |          |         |
| Hubei Province                   | 121/176 (68.8%) | 3.562 (2.285, 5.552) | <0.001   | <0.001  |
| Others                           | 76/222 (34.2%)  | 1 (Reference)        | NA       |         |
| Residence                        |                 |                      |          |         |
| Urban                            | 130/298 (43.6%) | 0.468 (0.276, 0.796) | 0.005    | 0.005   |
| Rural                            | 67/100 (67.0%)  | 1 (Reference)        | NA       |         |
| Income losses caused by COVID-19 |                 |                      |          |         |
| Light                            | 56/135 (41.5%)  | 0.605 (0.365, 1.001) | <0.001   | 0.001   |
| Middle                           | 24/70 (34.3%)   | 0.316 (0.167, 0.595) | 0.008    |         |
| Heavy                            | 117/193 (60.6%) | 1 (Reference)        | NA       |         |

**Table S2.** Prevalence of insomnia and associated factors.

| Variable               | Prevalence      | aOR (95% CI)         | p-value  |         |
|------------------------|-----------------|----------------------|----------|---------|
|                        |                 |                      | Category | Overall |
| ISI, insomnia symptoms |                 |                      |          |         |
| Overall                | 123/398 (30.9%) |                      |          |         |
| Age (years)            |                 |                      |          |         |
| 18–25                  | 16/78 (20.5%)   | 0.385 (0.141, 1.053) | 0.063    | 0.001   |
| 26–30                  | 22/127 (17.3%)  | 0.328 (0.135, 0.797) | 0.014    |         |
| 31–40                  | 69/145 (47.6%)  | 1.210 (0.565, 2.592) | 0.624    |         |
| >40                    | 16/48 (33.3%)   | 1 (Reference)        | NA       |         |
| Sex                    |                 |                      |          |         |
| Male                   | 56/201 (27.9%)  | 0.685 (0.421, 1.115) | 0.128    | 0.128   |
| Female                 | 67/197 (34.0%)  | 1 (Reference)        | NA       |         |
| Education              |                 |                      |          |         |
| <Undergraduate         | 57/110 (51.8%)  | 1.046 (0.536, 2.043) | 0.894    | 0.703   |
| College                | 34/180 (18.9%)  | 0.779 (0.504, 1.103) | 0.802    |         |
| >Master                | 32/108 (29.6%)  | 1 (Reference)        | NA       |         |
| Marital Status         |                 |                      |          |         |
| Married                | 51/197 (25.9%)  | 0.984 (0.564, 1.716) | 0.955    | 0.955   |
| Not married            | 72/201 (35.8%)  | 1 (Reference)        | NA       |         |
| Working Location       |                 |                      |          |         |
| Hubei Province         | 79/176 (44.9%)  | 2.347 (1.441, 3.823) | 0.001    | 0.001   |
| Others                 | 44/222 (19.8%)  | 1 (Reference)        | NA       |         |

| Residence                        |                |                      |        |  |        |
|----------------------------------|----------------|----------------------|--------|--|--------|
| Urban                            | 64/298 (21.5%) | 0.210(0.122, 0.363)  | <0.001 |  | <0.001 |
| Rural                            | 59/100 (59.0%) | 1 (Reference)        | NA     |  |        |
| Income losses caused by COVID-19 |                |                      |        |  |        |
| Light                            | 28/135 (20.7%) | 0.497 (0.279, 0.883) | 0.017  |  |        |
| Middle                           | 14/70 (20.0%)  | 0.314 (0.153, 0.644) | 0.001  |  | 0.001  |
| Heavy                            | 81/193 (42.0%) | 1 (Reference)        | NA     |  |        |

**Table S3.** Prevalence of distress and associated factors.

| Variable                         | Prevalence      | aOR (95% CI)         | p-value  |         |        |
|----------------------------------|-----------------|----------------------|----------|---------|--------|
|                                  |                 |                      | Category | Overall |        |
| IES-7, distress symptoms         |                 |                      |          |         |        |
| Overall                          | 271/398 (30.9%) |                      |          |         |        |
| Age (years)                      |                 |                      |          |         |        |
| 18–25                            | 46/78 (59.0%)   | 0.300 (0.114, 0.789) | 0.015    |         |        |
| 26–30                            | 66/127 (52.0%)  | 0.262 (0.111, 0.615) | 0.002    |         | <0.001 |
| 31–40                            | 121/145 (83.4%) | 1.039 (0.442, 2.440) | 0.930    |         |        |
| >40                              | 38/48 (79.2%)   | 1 (Reference)        | NA       |         |        |
| Sex                              |                 |                      |          |         |        |
| Male                             | 135/201 (67.2%) | 0.949 (0.605, 1.487) | 0.818    |         | 0.818  |
| Female                           | 136/197 (69.0%) | 1 (Reference)        | NA       |         |        |
| Education                        |                 |                      |          |         |        |
| <Undergraduate                   | 76/110 (69.1%)  | 0.824 (0.438, 1.551) | 0.548    |         | 0.191  |
| College                          | 129/180 (71.7%) | 1.394 (0.819, 2.372) | 0.221    |         |        |
| >Master                          | 66/108 (61.1%)  | 1 (Reference)        | NA       |         |        |
| Marital Status                   |                 |                      |          |         |        |
| Married                          | 136/197 (69.0%) | 1.093 (0.638, 1.874) | 0.745    |         | 0.745  |
| Not married                      | 135/201 (67.2%) | 1 (Reference)        | NA       |         |        |
| Working Location                 |                 |                      |          |         |        |
| Hubei Province                   | 143/176 (81.3%) | 2.950 (1.815, 4.794) | <0.001   |         | <0.001 |
| Others                           | 128/222 (57.7%) | 1 (Reference)        | NA       |         |        |
| Residence                        |                 |                      |          |         |        |
| Urban                            | 192/298 (64.4%) | 0.540(0.302, 0.965)  | 0.033    |         | 0.033  |
| Rural                            | 79/100 (79.0%)  | 1 (Reference)        | NA       |         |        |
| Income losses caused by COVID-19 |                 |                      |          |         |        |
| Light                            | 90/135 (66.7%)  | 1.176 (0.701, 1.974) | 0.538    |         | 0.809  |
| Middle                           | 48/70 (68.6%)   | 1.009 (0.535, 1.903) | 0.979    |         |        |
| Heavy                            | 133/193 (68.9%) | 1 (Reference)        | NA       |         |        |

**Table S4.** Prevalence of severe anxiety and associated factors.

| Variable                | No. of Severe Cases/<br>No. of Total Cases (%) | OR <sup>a</sup> (95% CI <sup>b</sup> ) | p-Value  |         |       |
|-------------------------|------------------------------------------------|----------------------------------------|----------|---------|-------|
|                         |                                                |                                        | Category | Overall |       |
| GAD-7, anxiety symptoms |                                                |                                        |          |         |       |
| Overall                 | 87/398 (21.9%)                                 |                                        |          |         |       |
| Age (years)             |                                                |                                        |          |         |       |
| 18–25                   | 9/78 (11.5%)                                   | 0.200 (0.065, 0.617)                   | 0.005    |         | 0.001 |
| 26–30                   | 15/127 (11.8%)                                 | 0.216 (0.083, 0.563)                   | 0.002    |         |       |
| 31–40                   | 43/145 (29.6%)                                 | 0.715 (0.322, 1.588)                   | 0.410    |         |       |
| >40                     | 20/48 (41.7%)                                  | 1 (Reference)                          | NA       |         |       |
| Sex                     |                                                |                                        |          |         |       |
| Male                    | 36/201 (17.9%)                                 | 0.593 (0.346, 1.019)                   | 0.057    |         | 0.057 |
| Female                  | 51/197 (25.9%)                                 | 1 (Reference)                          | NA       |         |       |
| Education               |                                                |                                        |          |         |       |
| <Undergraduate          | 42/110 (38.2%)                                 | 0.970 (0.458, 2.052)                   | 0.936    |         | 0.018 |

|                                  |                |                      |       |        |
|----------------------------------|----------------|----------------------|-------|--------|
| College                          | 24/180 (13.3%) | 0.429 (0.212, 0.871) | 0.019 |        |
| >Master                          | 21/108 (19.4%) | 1 (Reference)        | NA    |        |
| Marital Status                   |                |                      |       |        |
| Married                          | 44/197 (22.3%) | 1.119 (0.610, 2.053) | 0.716 | 0.716  |
| Not married                      | 43/201 (21.4%) | 1 (Reference)        | NA    |        |
| Working Location                 |                |                      |       |        |
| Hubei Province                   | 60/176 (34.1%) | 2.570(1.478,4.466)   | 0.001 | 0.001  |
| Others                           | 27/222 (12.2%) | 1 (Reference)        | NA    |        |
| Residence                        |                |                      |       |        |
| Urban                            | 47/298 (15.8%) | 0.385 (0.213, 0.696) | 0.002 | 0.002  |
| Rural                            | 40/100 (40.0%) | 1 (Reference)        | NA    |        |
| Income losses caused by COVID-19 |                |                      |       |        |
| Light                            | 15/135 (11.1%) | 0.332 (0.168, 0.658) | 0.002 | <0.001 |
| Middle                           | 9/70 (12.9%)   | 0.278 (0.123, 0.629) | 0.001 |        |
| Heavy                            | 63/193 (32.6%) | 1 (Reference)        | NA    |        |

**Table S5.** Prevalence of severe insomnia and associated factors.

| Variable                         | No. of Severe Cases/<br>No. of Total Cases (%) | aOR <sup>a</sup> (95% CI <sup>b</sup> ) | p-Value  |         |
|----------------------------------|------------------------------------------------|-----------------------------------------|----------|---------|
|                                  |                                                |                                         | Category | Overall |
| ISI, insomnia symptoms           |                                                |                                         |          |         |
| Overall                          | 31/398 (7.8%)                                  |                                         |          |         |
| Age (years)                      |                                                |                                         |          |         |
| 18–25                            | 4/78 (5.1%)                                    | 0.613 (0.125, 3.005)                    | 0.546    | 0.423   |
| 26–30                            | 4/127 (3.1%)                                   | 0.356 (0.080, 1.576)                    | 0.173    |         |
| 31–40                            | 18/145 (12.4%)                                 | 0.902 (0.289, 2.810)                    | 0.858    |         |
| >40                              | 5/48 (10.4%)                                   | 1 (Reference)                           | NA       |         |
| Sex                              |                                                |                                         |          |         |
| Male                             | 15/201 (7.5%)                                  | 0.937 (0.429, 2.045)                    | 0.870    | 0.870   |
| Female                           | 16/197 (8.1%)                                  | 1 (Reference)                           | NA       |         |
| Education                        |                                                |                                         |          |         |
| <Undergraduate                   | 18/110 (16.4%)                                 | 2.304 (0.653, 8.130)                    | 0.194    | 0.250   |
| College                          | 9/180 (5.0%)                                   | 1.100 (0.321, 3.772)                    | 0.879    |         |
| >Master                          | 4/108 (3.7%)                                   | 1 (Reference)                           | NA       |         |
| Marital Status                   |                                                |                                         |          |         |
| Married                          | 11/197 (5.6%)                                  | 0.784 (0.326, 1.886)                    | 0.585    | 0.585   |
| Not married                      | 20/201 (10.0%)                                 | 1 (Reference)                           | NA       |         |
| Working Location                 |                                                |                                         |          |         |
| Hubei Province                   | 21/176 (11.9%)                                 | 1.791(0.763,4.202)                      | 0.180    | 0.180   |
| Others                           | 10/222 (4.5%)                                  | 1 (Reference)                           | NA       |         |
| Residence                        |                                                |                                         |          |         |
| Urban                            | 14/298 (4.7%)                                  | 0.385 (0.163, 0.906)                    | 0.030    | 0.030   |
| Rural                            | 17/100 (17.0%)                                 | 1 (Reference)                           | NA       |         |
| Income losses caused by COVID-19 |                                                |                                         |          |         |
| Light                            | 6/135 (4.4%)                                   | 0.589 (0.209, 1.658)                    | 0.589    | 0.107   |
| Middle                           | 2/70 (2.9%)                                    | 0.251 (0.055, 1.142)                    | 0.251    |         |
| Heavy                            | 23/193 (11.9%)                                 | 1 (Reference)                           | NA       |         |

**Table S6.** Prevalence of severe distress and associated factors.

| Variable                 | No. of Severe Cases/<br>No. of Total Cases (%) | OR <sup>a</sup> (95% CI <sup>b</sup> ) | p-Value  |         |
|--------------------------|------------------------------------------------|----------------------------------------|----------|---------|
|                          |                                                |                                        | Category | Overall |
| IES-7, distress symptoms |                                                |                                        |          |         |
| Overall                  | 103/398 (25.9%)                                |                                        |          |         |
| Age (years)              |                                                |                                        |          |         |
| 18–25                    | 11/78 (14.1%)                                  | 0.195 (0.063, 0.597)                   | 0.004    | <0.001  |
| 26–30                    | 13/127 (10.2%)                                 | 0.159 (0.059, 0.433)                   | <0.001   |         |

|                                  |                |                      |        |        |
|----------------------------------|----------------|----------------------|--------|--------|
| 31–40                            | 63/145 (43.4%) | 0.921 (0.409, 2.073) | 0.842  |        |
| >40                              | 16/48 (33.3%)  | 1 (Reference)        | NA     |        |
| Sex                              |                |                      |        |        |
| Male                             | 50/201 (24.9%) | 0.911 (0.531, 1.561) | 0.734  | 0.734  |
| Female                           | 53/197 (26.9%) | 1 (Reference)        | NA     |        |
| Education                        |                |                      |        |        |
| <Undergraduate                   | 53/110 (48.2%) | 1.595 (0.751, 3.386) | 0.224  |        |
| College                          | 31/180 (17.2%) | 0.610 (0.302, 1.234) | 0.169  | 0.017  |
| >Master                          | 19/108 (17.6%) | 1 (Reference)        | NA     |        |
| Marital Status                   |                |                      |        |        |
| Married                          | 53/197 (26.9%) | 1.180 (0.642, 2.170) | 0.593  | 0.593  |
| Not married                      | 50/201 (24.9%) | 1 (Reference)        | NA     |        |
| Working Location                 |                |                      |        |        |
| Hubei Province                   | 76/176 (43.2%) | 4.066(2.328,7.102)   | <0.001 | <0.001 |
| Others                           | 27/222 (12.2%) | 1 (Reference)        | NA     |        |
| Residence                        |                |                      |        |        |
| Urban                            | 50/298 (16.8%) | 0.227 (0.126, 0.410) | <0.001 | <0.001 |
| Rural                            | 53/100 (53.0%) | 1 (Reference)        | NA     |        |
| Income losses caused by COVID-19 |                |                      |        |        |
| Light                            | 17/135 (12.6%) | 0.328 (0.166, 0.645) | 0.001  |        |
| Middle                           | 13/70 (18.6%)  | 0.325 (0.152, 0.694) | 0.004  | <0.001 |
| Heavy                            | 73/193 (37.8%) | 1 (Reference)        | NA     |        |
